# Supplementary material
Source: PubMed Central journal article supplement (PMC10603579)
Supplement: jamaoncol-e234255-s002.pdf [file jamaoncol-e234255-s002.pdf]

## Supplemental Online Content

Oudard S, Ratta R, Voog E, et al. Biweekly vs triweekly cabazitaxel schedule in men 65 years or older with metastatic castration-resistant prostate cancer: the CABASTY phase 3 randomized clinical trial. *JAMA Oncol*. Published online October 19, 2023. doi:10.1001/jamaoncol.2023.4255

**eAppendix 1.** List of Investigators

**eTable 1.** Cabazitaxel Exposure (Safety Patient Population)

**eTable 2.** Baseline Characteristics of Patients Who Developed or Not Grade  $\geq 3$  Neutropenia During Treatment, Regardless of Treatment Arm

**eTable 3.** First Occurrence of Grade  $\geq 3$  Neutropenia per Treatment Cycle (Safety Population)

**eFigure 1.** Forest Plot of Logistic Regression on Incidence of Grade  $\geq 3$  Neutropenia and/or Neutropenic Complications (Safety Population)

**eFigure 2.** Forest Plot of Treatment Effect on Overall Survival (Intent-to-Treat Population)

**eFigure 3.** Waterfall Plot of the PSA Response

**eTable 4.** Adverse Events (AEs) (Safety Population)

This supplementary material has been provided by the authors to give readers additional information about their work.

## eAppendix 1. List of Investigators

| Centre N° | Centres                                           | mail                                                                   | PI                        |
|-----------|---------------------------------------------------|------------------------------------------------------------------------|---------------------------|
| 250-001   | HEGP                                              | stephane.oudard@aphp.fr                                                | Stéphane Oudard           |
| 250-019   | Foch Hospital                                     | r.ratta@hopital-foch.com                                               | Rafaele Ratta             |
| 250-023   | Victor Hugo Clinics                               | e.voog@ilcgroupe.fr                                                    | Eric Voog                 |
| 250-015   | Strasbourg Hospital                               | p.barthelemy@icans.eu                                                  | Philippe Barthélémy       |
| 250-002   | Minjoz University Hospital                        | a.thieryvullemin@mac.com                                               | Antoine Thierry-Vuillemin |
| 250-004   | IMM                                               | Mostefa.Bennamoun@imm.fr                                               | Mostefa Bennamoun         |
| 250-020   | Pasteur Clinics                                   | alibasbini@oncologie-brest.fr                                          | Ali Hasbini               |
| 250-012   | Polyclinique Saint Côme                           | kais.aldabbagh@stcome.com                                              | Kais Aldabbagh            |
| 250-017   | Henri Mondor Hospital                             | carolina.saldana@aphp.fr                                               | Carolina Saldana          |
| 250-016   | Maurice Tubiana Centre, Caen                      | e.sevin@i-l-c.fr                                                       | Emmanuel Sevin            |
| 250-022   | Cancerology Center Les Dentellières, Valenciennes | ericamela@yahoo.fr                                                     | Eric Amela                |
| 276-008   | Hamburg-Eppendorf Universitätsklinikum            | g.von-amsberg@uke.de                                                   | Gunhild von Amsberg       |
| 250-014   | Caremeau University Hospital                      | nadine.HOUEDE@chu-nimes.fr                                             | Nadine Houédé             |
| 250-008   | Armorican centre of Radiotherapy                  | d.besson@cario-sante.fr                                                | Dominique Besson          |
| 276-006   | Nürtingen Studienpraxis Urologie                  | feyerabend@studienurologie.de                                          | Susan Feyerabend          |
| 276-009   | Münster University Hospital                       | martin.boegemann@ukmuenster.de                                         | Martin Bögemann           |
| 276-007   | Köln Uniklinik                                    | david.pfister@uk-koeln.de                                              | David Pfister             |
| 276-001   | Magdeburg University Hospital                     | martin.schostak@med.ovgu.de                                            | Martin Schostak           |
| 250-003   | Hôpital Cochin, Paris                             | <a href="mailto:olivier.huillard@aphp.fr">olivier.huillard@aphp.fr</a> | Olivier Huillard          |
| 250-006   | Rouen University Hospital                         | Frederic.difiore@chu-rouen.fr                                          | Frederic Di Fiori         |
| 250-010   | Bordeaux University Hospital                      | amandine.quivy@chu-bordeaux.fr                                         | Amandine Quivy            |
| 276-004   | Bernburg Oncology Health Centre                   | Carsten.Lange2@gmx.net                                                 | Carsten Lange             |
| 250-013   | Bégin Military Teaching Hospital                  | carole.helissey@gmail.com                                              | Carole Helissey           |

**eTable 1. Cabazitaxel Exposure (Safety Patient Population)**

| Characteristic                                                   | CBZ25 q3w <sup>a</sup><br>(n = 96) | CBZ16 q2w <sup>a</sup><br>(n = 98) | Overall<br>(n = 194) | p-value <sup>b</sup> |
|------------------------------------------------------------------|------------------------------------|------------------------------------|----------------------|----------------------|
| <b>Number of cycles received</b>                                 |                                    |                                    |                      | .03                  |
| Mean (SD)                                                        | 6.5 (3.0)                          | 5.6 (2.6)                          | 6.0 (2.8)            |                      |
| Median (IQR)                                                     | 6.0 (4.0-10.0)                     | 5.0 (4.0-7.0)                      | 6.0 (4.0-9.0)        |                      |
| Range                                                            | (1.0-10.0)                         | (1.0-10.0)                         | (1.0-10.0)           |                      |
| <b>Treatment duration (weeks)</b>                                |                                    |                                    |                      | .21                  |
| Mean (SD)                                                        | 19.8 (9.2)                         | 22.1 (10.8)                        | 20.9 (10.1)          |                      |
| Median (IQR)                                                     | 19.0 (12.0-30.0)                   | 20.0 (13.9-30.8)                   | 19.4 (12.1-30.0)     |                      |
| Range                                                            | (3.0-33.7)                         | (4.0-42.0)                         | (3.0-42.0)           |                      |
| <b>Cumulative dose, No<sup>c</sup> (mg/m<sup>2</sup>)</b>        |                                    |                                    |                      | .20                  |
| Mean (SD)                                                        | 146.6 (69.1)                       | 165.9 (83.0)                       | 156.2 (76.8)         |                      |
| Median (IQR)                                                     | 142.5 (87.2-205.0)                 | 142.7 [101.7-225.3)                | 142.7 (96.4-209.5)   |                      |
| Range                                                            | (11.8-253.8)                       | (27.6-326.2)                       | (11.8-326.2)         |                      |
| <b>Dose intensity, No. <sup>c</sup> (mg/m<sup>2</sup>/cycle)</b> |                                    |                                    |                      | < .001               |
| Mean (SD)                                                        | 22.4 (2.6)                         | 30.1 (2.2)                         | 26.2 (4.6)           |                      |
| Median (IQR)                                                     | 22.8 (20.5-24.5)                   | 30.7 (29.0-31.7)                   | 25.2 (22.7-30.7)     |                      |
| Range                                                            | (11.8-25.9)                        | (22.6-32.8)                        | (11.8-32.8)          |                      |
| <b>Relative dose intensity, No. <sup>c</sup> (%)</b>             |                                    |                                    |                      | .75                  |
| Mean (SD)                                                        | 91.1 (9.6)                         | 92.0 (7.8)                         | 91.5 (8.7)           |                      |
| Median (IQR)                                                     | 92.7 (83.7-98.9)                   | 92.8 (87.0-98.9)                   | 92.7 (86.3-98.9)     |                      |
| Range                                                            | (47.1-103.5)                       | (69.6-103.1)                       | (47.1-103.5)         |                      |
| <b>Patients with ≥ 1 dose reduction, No. (%)</b>                 |                                    |                                    |                      | < .001               |
| Yes                                                              | 45.0 (46.9)                        | 10.0 (10.2)                        | 55.0 (28.4)          |                      |

Abbreviations: CBZ16 q2w, biweekly cabazitaxel 16mg/m<sup>2</sup>; CBZ25 q3w, triweekly cabazitaxel 25mg/m<sup>2</sup>; IQR, interquartile range; SD, standard deviation;

<sup>a</sup>Duration of each cycle is 3 weeks in CBZ25q3w arm and 4 weeks in CBZ16 q2w.

<sup>b</sup>Quantitative variable: Student t test (normal distribution) or Wilcoxon-Mann-Whitney (non-normal distribution) /

Qualitative variable: Chi-squared test or Fisher's exact test.

\*\* \* Missing values < 5%.

**eTable 2.** Baseline Characteristics of Patients Who Developed or Not Grade  $\geq 3$  Neutropenia During Treatment, Regardless of Treatment Arm

| Characteristic                                          | No Grade $\geq 3$ neutropenia<br>(n = 131) | Grade $\geq 3$ Neutropenia<br>(n = 65) | Overall<br>(n = 196) | p-value <sup>a</sup> |
|---------------------------------------------------------|--------------------------------------------|----------------------------------------|----------------------|----------------------|
| <b>Arms, No. (%)</b>                                    |                                            |                                        |                      | < .001               |
| CBZ25 q3w                                               | 37 (28)                                    | 60 (92)                                | 97 (49)              |                      |
| CBZ16 q2w                                               | 94 (72)                                    | 5 (8)                                  | 99 (51)              |                      |
| <b>Age, years</b>                                       |                                            |                                        |                      | < .001               |
| median                                                  | 74.4 (6.1)                                 | 77.4 (5.8)                             | 74.6                 |                      |
| (q1; q3)                                                | 73.53 [69.7;78.2]                          | 77.2 [72.8;81.5]                       | [70.4;79.3]          |                      |
| [range]                                                 | (65;95.8)                                  | (65.6;92.1)                            | (65;95.8)            |                      |
| <b>Age class, years, No. (%)</b>                        |                                            |                                        |                      | .01                  |
| < 75 years                                              | 76 (58)                                    | 24 (37)                                | 100 (51)             |                      |
| 75-80 years                                             | 33 (25)                                    | 21 (32)                                | 54 (28)              |                      |
| $\geq 80$ years                                         | 22 (17)                                    | 20 (31)                                | 42 (21)              |                      |
| <b>ECOG performance status, No. (%)</b>                 |                                            |                                        |                      | .25                  |
| 0-1                                                     | 123 (94)                                   | 58 (89)                                | 181 (92)             |                      |
| 2                                                       | 8 (6)                                      | 7 (11)                                 | 15 (8)               |                      |
| <b>Gleason score, No. (%)</b>                           |                                            |                                        |                      | .92                  |
| $\leq 7$                                                | 63 (52)                                    | 33 (52)                                | 96 (52)              |                      |
| 8 to 10                                                 | 59 (48)                                    | 30 (48)                                | 89 (48)              |                      |
| <b>Baseline PSA values<sup>b</sup>, (ng/ml)</b>         |                                            |                                        |                      | .84                  |
| Mean (SD)                                               | 229.6 (351.9)                              | 126.4 (147.3)                          | 194.3 (301.6)        |                      |
| Median (IQR)                                            | 69.7 [22.3;255.5]                          | 67.1 [35.1;178.9]                      | 68.4 [23.5;217]      |                      |
| Range                                                   | (2.7;2073.0)                               | (4.31;718.0)                           | (2.7;2073.0)         |                      |
| <b>Lactate dehydrogenase (LDH), No.<sup>b</sup> (%)</b> |                                            |                                        |                      | .92                  |
| $\geq$ ULN                                              | 67 (55)                                    | 33 (54)                                | 100 (55)             |                      |
| <b>Alkaline phosphatase, No.<sup>b</sup> (%)</b>        |                                            |                                        |                      | .43                  |
| $\geq$ ULN                                              | 52 (42)                                    | 30 (48)                                | 82 (44)              |                      |
| <b>Hemoglobin, No.<sup>b</sup> (%)</b>                  |                                            |                                        |                      | .69                  |
| < LLN                                                   | 79 (62)                                    | 37 (59)                                | 116 (61)             |                      |
| <b>Neutrophils, No./Total No.<sup>b</sup> (%)</b>       |                                            |                                        |                      | .04                  |
| $\geq$ median (= 4.10)                                  | 71 (55)                                    | 25 (40)                                | 96 (50)              |                      |
| <b>NLR, No./Total No.<sup>b</sup> (%)</b>               |                                            |                                        |                      | .15                  |
| $\geq 3$                                                | 75 (59)                                    | 30 (48)                                | 105 (55)             |                      |
| <b>M1 disease at cancer diagnostic, No. (%)</b>         |                                            |                                        |                      | .96                  |
| Yes                                                     | 63 (50)                                    | 31 (49)                                | 94 (49)              |                      |

| Characteristic                                                  | No Grade $\geq 3$ neutropenia<br>(n = 131) | Grade $\geq 3$ Neutropenia<br>(n = 65) | Overall<br>(n = 196) | p-value <sup>a</sup> |
|-----------------------------------------------------------------|--------------------------------------------|----------------------------------------|----------------------|----------------------|
| No                                                              | 64 (50)                                    | 32 (51)                                | 96 (51)              |                      |
| <b>Metastases, No. (%)</b>                                      |                                            |                                        |                      |                      |
| Bone                                                            | 101 (81)                                   | 54 (87)                                | 155 (83)             | .28                  |
| Lymph                                                           | 56 (45)                                    | 23 (37)                                | 79 (42)              | .32                  |
| Lung                                                            | 14 (11)                                    | 6 (10)                                 | 20 (11)              | .75                  |
| Liver                                                           | 12 (10)                                    | 6 (10)                                 | 18 (10)              | .99                  |
| <b>G8 score, No. (%)</b>                                        |                                            |                                        |                      |                      |
| < 14                                                            | 24 (18)                                    | 15 (23)                                | 39 (20)              | .43                  |
| $\geq 14$                                                       | 107 (82)                                   | 50 (77)                                | 157 (80)             |                      |
| <b>SIOG health status, No. (%)</b>                              |                                            |                                        |                      |                      |
| Fit                                                             | 91 (69)                                    | 46 (71)                                | 137 (70)             | .97                  |
| Vulnerable                                                      | 16 (12)                                    | 8 (12)                                 | 24 (12)              |                      |
| Frail                                                           | 24 (18)                                    | 11 (17)                                | 35 (18)              |                      |
| <b>Comorbidities, No. (%)</b>                                   |                                            |                                        |                      |                      |
| HTA                                                             | 49 (37)                                    | 20 (31)                                | 69 (35)              | .36                  |
| Hypercholesterolaemia                                           | 15 (11)                                    | 5 (8)                                  | 20 (10)              | .41                  |
| Diabetes                                                        | 18 (14)                                    | 7 (11)                                 | 25 (13)              | .85                  |
| <b>Pain visual analog score, No. <sup>b</sup> (%)</b>           |                                            |                                        |                      |                      |
| 0-3                                                             | 105 (81)                                   | 52 (83)                                | 157 (81)             | .77                  |
| 4-10                                                            | 25 (19)                                    | 11 (17)                                | 36 (19)              |                      |
| <b>Prior AR-targeted agent lines, No. <sup>b</sup> (%)</b>      |                                            |                                        |                      |                      |
| 1 line                                                          | 31 (25)                                    | 16 (25)                                | 47 (25)              | .96                  |
| 2 lines                                                         | 34 (27)                                    | 17 (28)                                | 51 (27)              |                      |
| $\geq 3$ lines                                                  | 62 (49)                                    | 29 (46)                                | 91 (48)              |                      |
| <b>Prior chemotherapy lines, No. <sup>b</sup> (%)</b>           |                                            |                                        |                      |                      |
| 1 line                                                          | 111 (85)                                   | 55 (85)                                | 166 (85)             | .61                  |
| 2 lines                                                         | 13 (10)                                    | 5 (8)                                  | 18 (9)               |                      |
| $\geq 3$ lines                                                  | 6 (5)                                      | 5 (8)                                  | 11 (6)               |                      |
| <b>Prior docetaxel, No. (%)</b>                                 |                                            |                                        |                      |                      |
| Yes                                                             | 97 (100)                                   | 99 (100)                               | 196 (100)            | ---                  |
| <b>Cumulative docetaxel dose <sup>b</sup>, mg/m<sup>2</sup></b> |                                            |                                        |                      |                      |
| Median (IQR)                                                    | 450.0 [300.0;596.5]                        | 450.0 [300.0;556.0]                    | 450.0 [300.0;593.0]  | 1                    |
| <b>Type of prior AR-targeted agent, No <sup>b</sup> (%)</b>     |                                            |                                        |                      |                      |

| <b>Characteristic</b>    | <b>No Grade <math>\geq 3</math><br/>neutropenia<br/>(n = 131)</b> | <b>Grade <math>\geq 3</math><br/>Neutropenia<br/>(n = 65)</b> | <b>Overall<br/>(n = 196)</b> | <b>p-value<sup>a</sup></b> |
|--------------------------|-------------------------------------------------------------------|---------------------------------------------------------------|------------------------------|----------------------------|
| Abiraterone              | 82 (63)                                                           | 40 (62)                                                       | 122 (62)                     | .89                        |
| Enzalutamide             | 75 (57)                                                           | 36 (55)                                                       | 111 (57)                     | .80                        |
| Abiraterone/enzalutamide | 43 (33)                                                           | 23 (35)                                                       | 66 (34)                      | .72                        |
| Apalutamide              | 2 (2)                                                             | 2 (3)                                                         | 4 (2)                        | .60                        |
| Darolutamide             | 4 (3)                                                             | 1 (2)                                                         | 5 (3)                        | 1                          |

Abbreviations: AR, androgen receptor; ECOG, Eastern Cooperative Oncology Group; HTA, hypertension; IQR, interquartile range; LLN, lower limit of normal; NLR, neutrophil to lymphocyte ratio; PSA, Prostate Specific Antigen; SIOG, International Society of Geriatric Oncology; SD, standard deviation; ULN, upper limit of normal  
<sup>a</sup>Quantitative variable: Student t test (normal distribution) or Wilcoxon-Mann-Whitney (non-normal distribution) / Qualitative variable: Chi-squared test or Fisher's exact test.

<sup>b</sup> Missing values < 5%.

**eTable 3.** First Occurrence of Grade  $\geq 3$  Neutropenia per Treatment Cycle (Safety Population)

| <b>Characteristic</b>                                                   | <b>CBZ25 q3w</b><br>(n = 96) | <b>CBZ16 q2w</b><br>(n = 98) | <b>Overall</b><br>(n=194) |
|-------------------------------------------------------------------------|------------------------------|------------------------------|---------------------------|
| <b>Patients with grade <math>\geq 3</math> neutropenia</b>              | 60                           | 5                            | 65                        |
| <b>Time to Nadir (days)</b>                                             | 8                            | 12                           | NA                        |
| <b>Distribution per cycle of the 1<sup>st</sup> neutropenia episode</b> |                              |                              |                           |
| Cycle 1                                                                 | 41                           | 1                            | 42                        |
| Cycle 2                                                                 | 9                            | 2                            | 11                        |
| Cycle 3                                                                 | 3                            | 0                            | 3                         |
| Cycle 4                                                                 | 2                            | 0                            | 2                         |
| Cycle 5                                                                 | 2                            | 1                            | 3                         |
| Cycle 6                                                                 | 0                            | 0                            | 0                         |
| Cycle 7                                                                 | 1                            | 0                            | 1                         |
| Cycle 8                                                                 | 1                            | 0                            | 1                         |
| Cycle 9                                                                 | 0                            | 0                            | 0                         |
| Cycle 10                                                                | 1                            | 1                            | 1                         |

Abbreviations:

CBZ25 q3w, triweekly cabazitaxel 25mg/m<sup>2</sup>;CBZ16 q2w, biweekly cabazitaxel 16mg/m<sup>2</sup>

**eFigure 1.** Forest Plot of Logistic Regression on Incidence of Grade ≥3 Neutropenia and/or Neutropenic Complications (Safety Population)

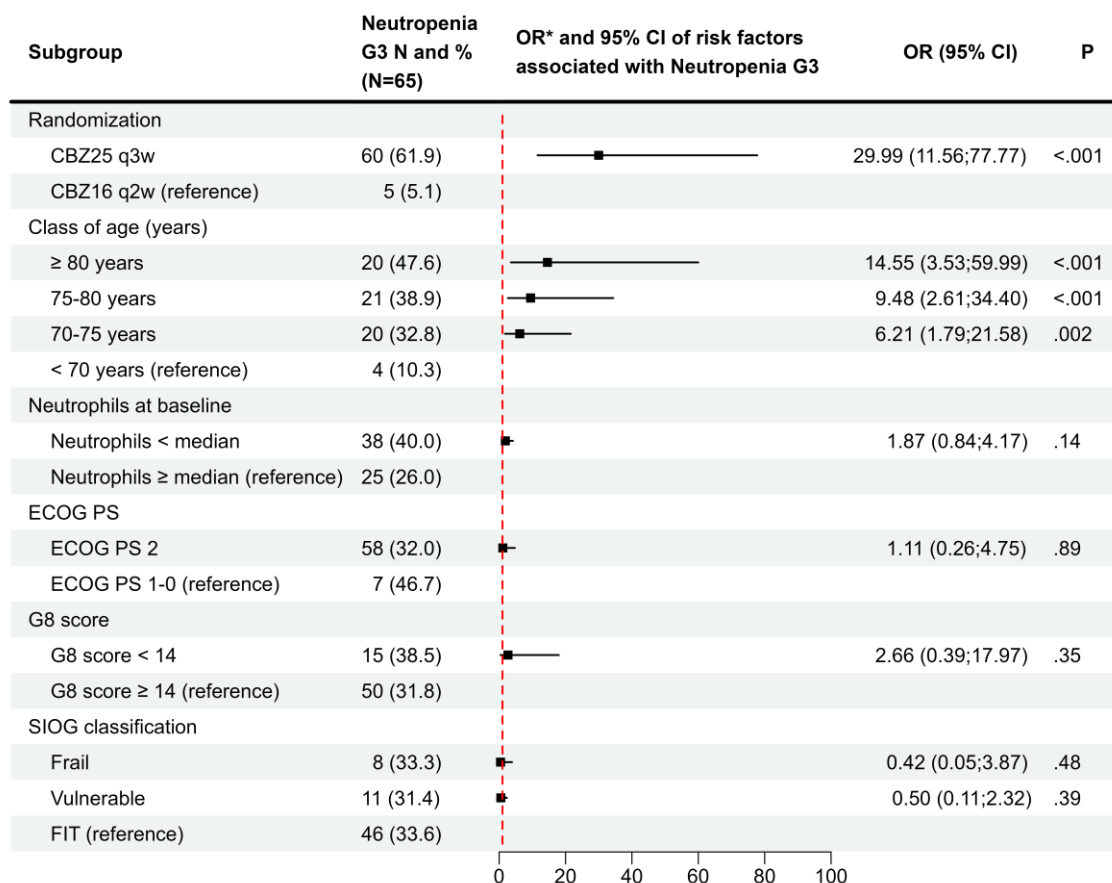

The probability to have a grade 3 neutropenia versus not was calculated using a Firth's Penalized Likelihood logistic regression, adjusted on randomization arm, neutrophils at baseline, SIOG classification, G8 score and class of age. <sup>a</sup>Each class of age was compared to the <70 years class. Abbreviations : CI: confidence interval; G3 : Grade 3 ; G8: geriatric-8; OR: Odds Ratio; ECOG PS : Eastern Cooperative Oncology Group Performance Status; SIOG: International Society of Geriatric Oncology.



**eFigure 2.** Forest Plot of Treatment Effect on Overall Survival (Intent-to-Treat Population)

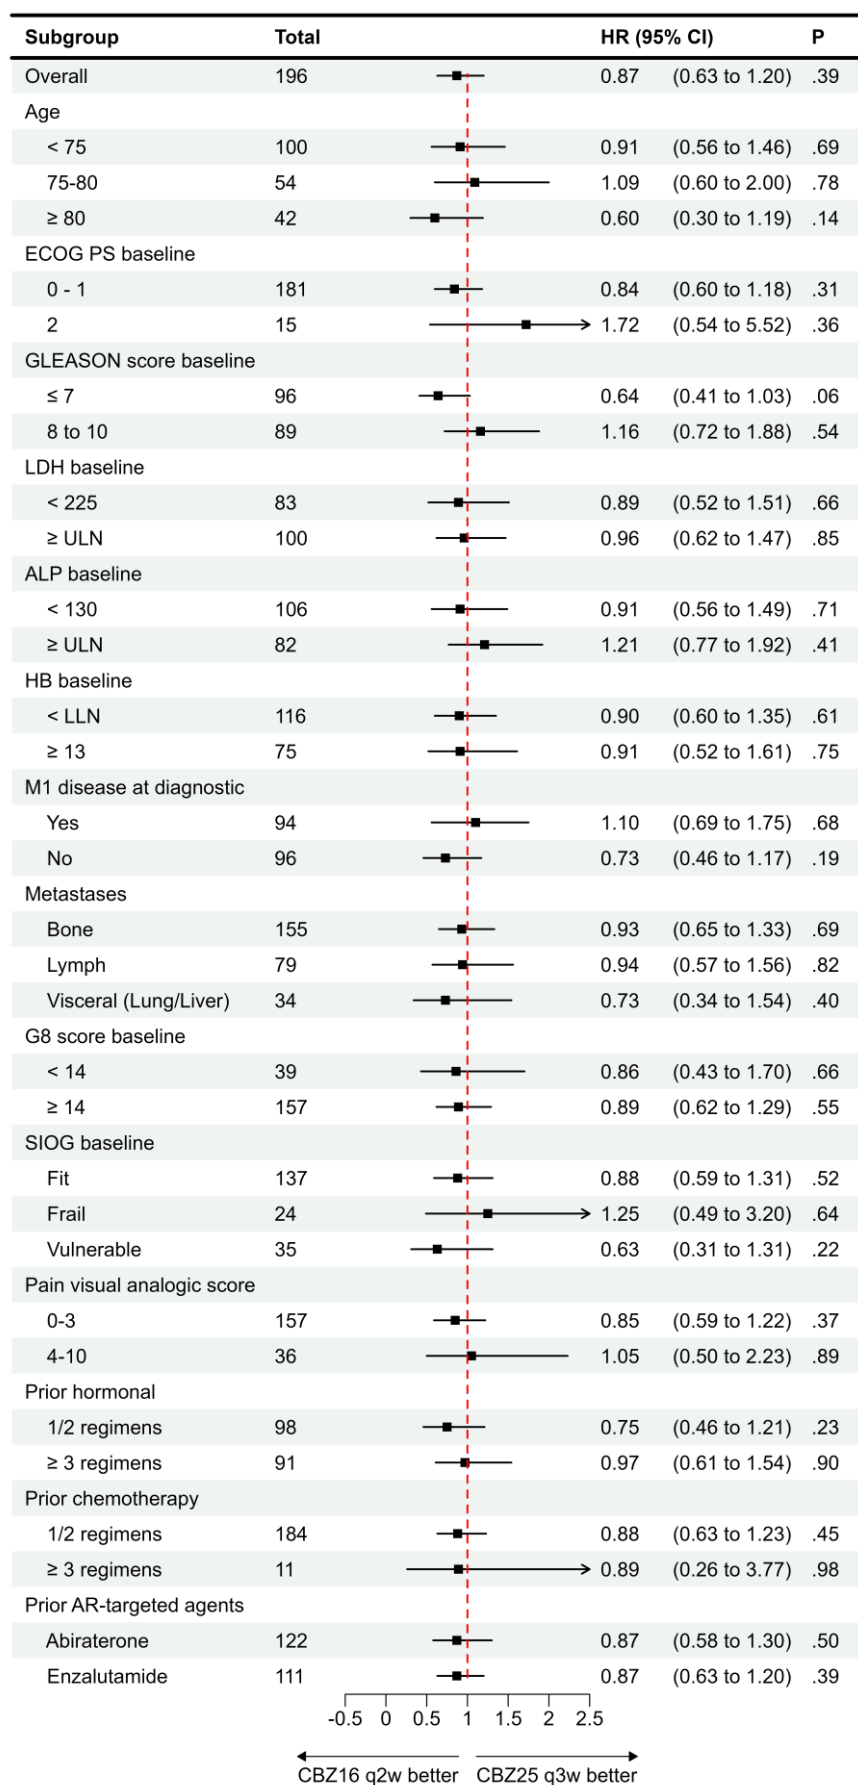

Abbreviations: ALP, alkaline phosphatase; AR, androgen receptor; CBZ16 q2w, biweekly cabazitaxel 16mg/m<sup>2</sup>; CBZ25 q3w, triweekly cabazitaxel 25mg/m<sup>2</sup>; CI, confidence interval; ECOG, Eastern Cooperative Oncology Group; HB, hemoglobin; HR, hazard ratio; LDH, lactate dehydrogenase; LLN, lower limit of normal; SIOG, International Society of Geriatric Oncology;

**eFigure 3.** Waterfall Plot of the PSA Response

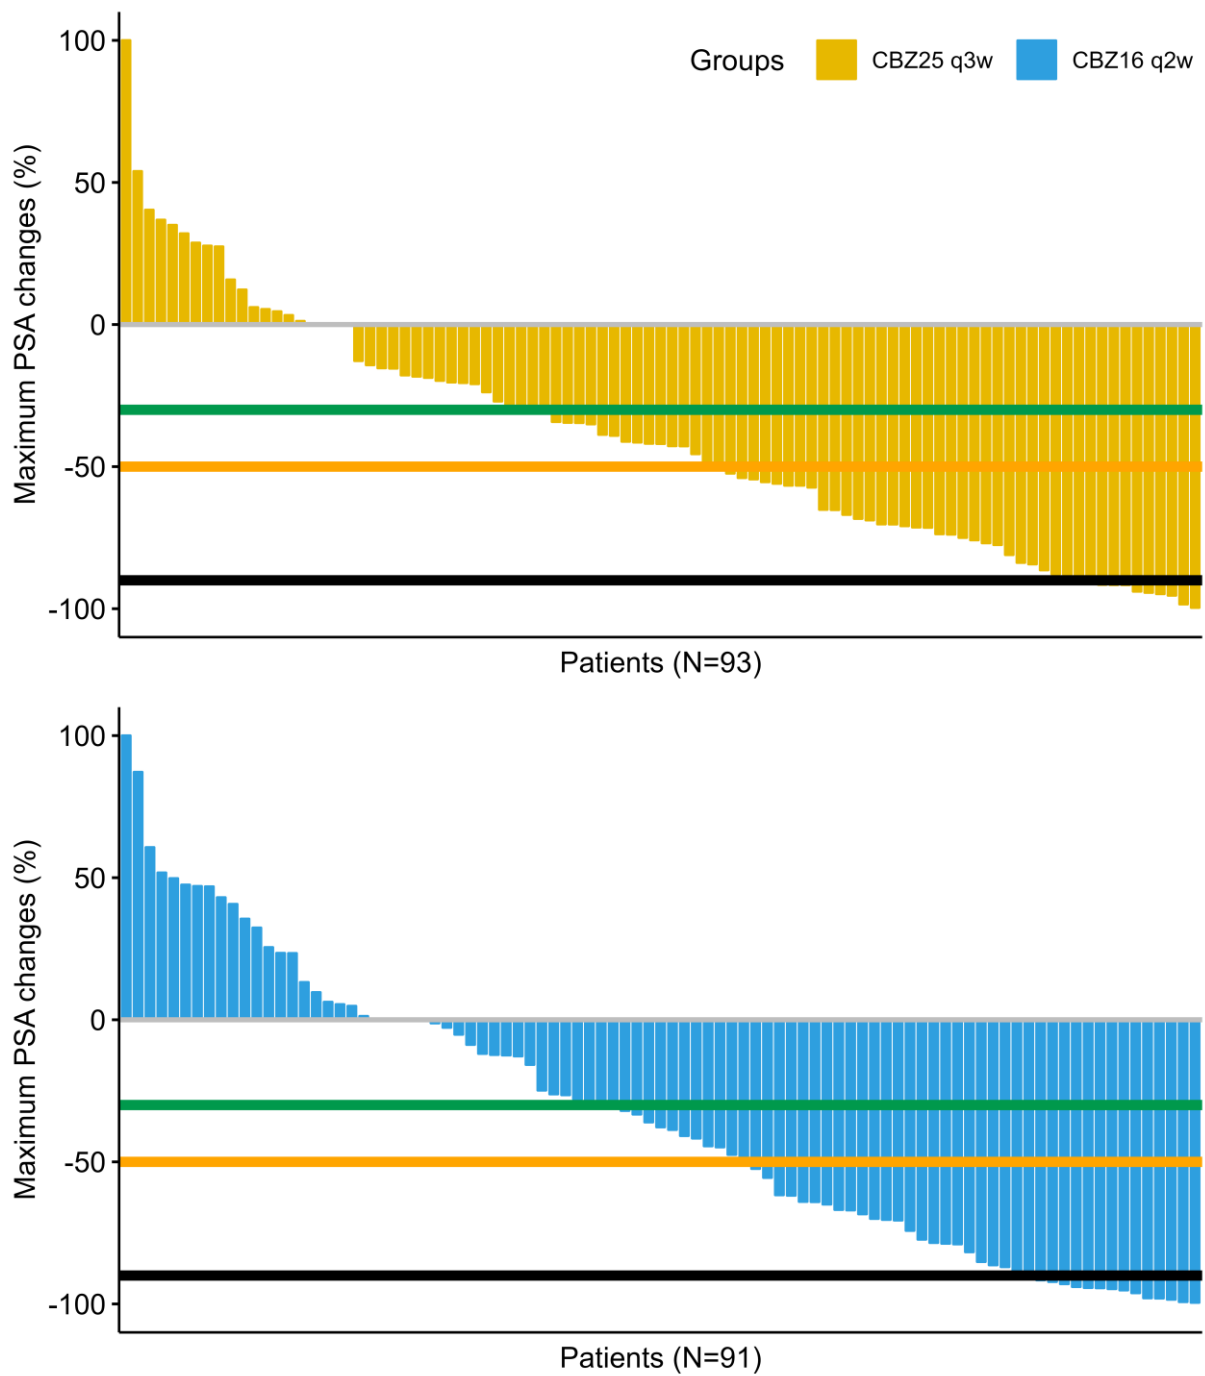

PSA response was evaluable in 184 patients (93 patients in the CBZ25 q3w arm and 91 in the CBZ16 q2w group). Patients with PSA level < 2ng/mL at baseline were excluded from this analysis.

**eTable 4.** Adverse Events (AEs) (Safety Population)

| Event                                                          | CBZ25 q3w<br>(n = 96) |                | CBZ16 q2w<br>(n = 98) |                |
|----------------------------------------------------------------|-----------------------|----------------|-----------------------|----------------|
|                                                                | Any grade             | Grade $\geq$ 3 | Any grade             | Grade $\geq$ 3 |
| Any AE – No. (%)                                               | 95 (99.0)             | ---            | 98 (100)              | ---            |
| Any grade $\geq$ 3 AE – No. (%)                                | ---                   | 70 (72.9)      | ---                   | 55 (56.1)      |
| Any serious AE – No. (%)                                       | 42 (43.8)             | ---            | 45 (45.9)             | ---            |
| Any AE leading to permanent treatment discontinuation – no (%) | 32 (33.3)             | 25 (26)        | 31 (31.6)             | 18 (18.4)      |
| TEAEs leading to death within 30 days of CBZ – No. (%)         | 5 (5.2)               | 5 (5.2)        | 10 (10.2)             | 10 (10.2)      |
| <b>Common AE – No. (%)</b>                                     |                       |                |                       |                |
| Fatigue                                                        | 65 (67.7)             | 13 (13.5)      | 67 (68.4)             | 8 (8.2)        |
| Diarrhea                                                       | 57 (59.4)             | 4 (4.2)        | 54 (55.1)             | 6 (6.1)        |
| Nausea or vomiting                                             | 28 (29.2)             | 0 (0.0)        | 41 (41.8)             | 1 (1.0)        |
| Infection                                                      | 28 (29.2)             | 7 (7.3)        | 37 (37.7)             | 11 (11.2)      |
| Decreased appetite                                             | 29 (10.4)             | 2 (2.1)        | 28 (28.6)             | 1 (1.0)        |
| Musculoskeletal pain or discomfort                             | 22 (22.9)             | 1 (1.0)        | 34 (34.7)             | 0              |
| Hematuria                                                      | 19 (19.8)             | 0 (0.0)        | 32 (32.7)             | 2 (2.0)        |
| Peripheral neuropathy                                          | 18 (18.7)             | 1 (1.0)        | 24 (24.4)             | 0 (0.0)        |
| Constipation                                                   | 19 (19.8)             | 0 (0.0)        | 22 (22.4)             | 0 (0.0)        |
| Bladder and urethral symptoms                                  | 12 (12.5)             | 2 (2.0)        | 21 (21.4)             | 0 (0.0)        |
| Abdominal pain                                                 | 10 (10.4)             | 1 (1.0)        | 11 (10.2)             | 1 (1.0)        |
| Stomatitis                                                     | 9 (9.4)               | 0 (0.0)        | 10 (10.2)             | 0 (0.0)        |
| Peripheral edema                                               | 10 (10.4)             | 1 (1.0)        | 8 (8.1)               | 0 (0.0)        |
| Arthralgia                                                     | 10 (10.4)             | 1 (1.0)        | 7 (7.1)               | 0 (0.0)        |
| Dyspnea                                                        | 10 (10.4)             | 2 (2.1)        | 4 (4.1)               | 1 (1.0)        |
| Renal disorder                                                 | 7 (7.3)               | 1 (1.0)        | 8 (8.1)               | 2 (2.0)        |
| Alopecia                                                       | 8 (8.3)               | 0 (0.0)        | 5 (5.1)               | 0 (0.0)        |
| Cardiac and vascular disorder                                  | 6 (6.3)               | 2 (2.0)        | 6 (6.1)               | 4 (4.0)        |
| Hypertensive disorder                                          | 3 (3.1)               | 0 (0.0)        | 6 (6.1)               | 0 (0.0)        |
| Bone fracture                                                  | 4 (4.2)               | 2 (2.0)        | 2 (2.0)               | 1 (1.0)        |
| Nail disorder                                                  | 5 (5.2)               | 1 (1.0)        | 1 (1.0)               | 0 (0.0)        |

| Event                                                                     | CBZ25 q3w<br>(n = 96) |                | CBZ16 q2w<br>(n = 98) |                |
|---------------------------------------------------------------------------|-----------------------|----------------|-----------------------|----------------|
|                                                                           | Any grade             | Grade $\geq$ 3 | Any grade             | Grade $\geq$ 3 |
| <b>Hematologic TEAEs based on laboratory abnormalities, No./total (%)</b> |                       |                |                       |                |
| Anemia                                                                    | 95 (99.0)             | 15 (15.6)      | 97 (99.0)             | 14 (14.3)      |
| Leukopenia                                                                | 70 (72.9)             | 54 (56.2)      | 12 (12.2)             | 4 (4.1)        |
| Neutropenia                                                               | 93 (96.9)             | 60 (62.5)      | 78 (79.6)             | 5 (5.1)        |
| Thrombocytopenia                                                          | 96 (100.0)            | 4 (4.1)        | 96 (98.0)             | 1 (1.0)        |

Abbreviations: CBZ, cabazitaxel; CBZ16 q2w, biweekly cabazitaxel 16mg/m<sup>2</sup>; CBZ25 q3w, triweekly cabazitaxel 25mg/m<sup>2</sup>; TEAE, treatment emergent adverse event
