# Supplementary material
Source: PubMed Central journal article supplement (PMC10603579)
Supplement: jamaoncol-e234255-s003.pdf [file jamaoncol-e234255-s003.pdf]

## Data Sharing Statement

### Data

**Data available:** Yes

**Data types:** Deidentified participant data

**How to access data:** [stephane.oudard@aphp.fr](mailto:stephane.oudard@aphp.fr)

**When available:** With publication

### Supporting Documents

**Document types:** None

### Additional Information

**Who can access the data:** researchers whose proposed use of the data has been approved

**Types of analyses:** for clinical research

**Mechanisms of data availability:** after approval of a proposal
